1 **Resistance to serine in *Bacillus subtilis*: Identification of the serine transporter**

2 **YbeC and of a metabolic network that links serine and threonine metabolism**

3

4 **Anika Klewing<sup>1</sup>, Byoung Mo Koo<sup>2</sup>, Larissa Krüger<sup>1</sup>, Anja Poehlein<sup>3</sup>, Daniel Reuß<sup>1</sup>, Rolf Daniel<sup>3</sup>, Carol**

5 **A. Gross<sup>2</sup> and Jörg Stülke<sup>1\*</sup>**

6

7 <sup>1</sup>Department of General Microbiology, GZMB, Georg-August-University Göttingen, Grisebachstr. 8, D-

8 37077 Göttingen, Germany.

9 <sup>2</sup>Department of Microbiology and Immunology, University of California, San Francisco, San Francisco,

10 CA 94158, USA

11 <sup>3</sup>Department of Genomic and Applied Microbiology, GZMB, Georg-August-University Göttingen,

12 Göttingen, Germany

13

14

15 \* Corresponding author

16 Jörg Stülke: Department of General Microbiology, Georg-August-University Göttingen, Grisebachstr. 8,

17 37077, Göttingen, Germany; Phone: +49-551-3933781; Fax: +49-551-3933808; [jstuelk@gwdg.de](mailto:jstuelk@gwdg.de)

18

19

20 **Running title: Serine transport in *Bacillus subtilis***

21

22 **Key words:** serine acquisition, threonine transport, toxic metabolites, suppressor mutants, transporter

23 promiscuity

24

25 **Originality-Significance Statement**

26 Serine is an important precursor for many biosynthetic reactions, and lack of this amino acid can induce  
27 biofilm formation in *Bacillus subtilis*. However, serine is toxic for the growth of *B. subtilis*. To  
28 understand the reason(s) for this toxicity and to identify the so far unknown serine transporter(s) of  
29 this bacterium, we performed exhaustive mutant screens to isolate serine-resistant mutants. This  
30 screen identified YbeC, the major serine transporter of *B. subtilis*. Moreover, we observed an intimate  
31 link between serine and threonine metabolism that is responsible for serine toxicity by inhibiting  
32 threonine biosynthesis.

33

34 **Summary**

35 The Gram-positive bacterium *Bacillus subtilis* uses serine not only as building block for proteins but  
36 also as an important precursor in many anabolic reactions. Moreover, a lack of serine results in the  
37 initiation of biofilm formation. However, in excess serine inhibits the growth of *B. subtilis*. To unravel  
38 the underlying mechanisms, we isolated suppressor mutants that can tolerate toxic serine  
39 concentrations by three targeted and non-targeted genome-wide screens. All screens as well as  
40 genetic complementation in *Escherichia coli* identified the so far uncharacterized permease YbeC as  
41 the major serine transporter of *B. subtilis*. In addition to YbeC, the threonine transporters BcaP and  
42 YbxG make minor contributions to serine uptake. A strain lacking these three transporters was able to  
43 tolerate 100 mM serine whereas the wild type strain was already inhibited by 1 mM of the amino acid.  
44 The screen for serine-resistant mutants also identified mutations that result in increased serine  
45 degradation and in increased expression of threonine biosynthetic enzymes suggesting that serine  
46 toxicity results from interference with threonine biosynthesis.

47

## 48 **Introduction**

49

50 As building block of proteins, amino acids are central to the physiology of any living cell. In addition to  
51 their role as substrates in protein biosynthesis, they can be used as carbon and nitrogen sources.  
52 Moreover, some amino acids are also required for bacterial cell wall biosynthesis and as  
53 osmoprotectants. Accordingly, the acquisition of amino acids is an essential task of all cells. This can  
54 be achieved by the direct uptake of amino acids present in the growth medium, by the uptake and  
55 intracellular degradation of peptides and by *de novo* biosynthesis. Many bacteria such as the model  
56 organisms *Escherichia coli* and *Bacillus subtilis* are capable of synthesizing all amino acids whereas  
57 others such as the minimal bacteria of the genus *Mycoplasma* completely depend on the uptake of  
58 amino acids.

59 While amino acids are essential for the cells, increased concentrations of some amino acids  
60 such as glutamate, threonine or serine can be harmful (Lamb and Bott 1979a; Lamb and Bott 1979b;  
61 Lachowicz *et al.*, 1996; Ogawa *et al.*, 1998; Mundhada *et al.*, 2017; Belitsky, 2015; Commichau *et al.*,  
62 2008; Belitsky and Sonenshein, 1998). Therefore, the homeostasis of the amino acids must be tightly  
63 controlled to adjust the intracellular levels of each amino acid to the actual need of the cell. This  
64 requires balanced activities of systems for amino acid acquisition and degradation. For the Gram-  
65 positive model bacterium *B. subtilis*, amino acid metabolism is one of the few functions in core  
66 metabolism that have not yet been completely elucidated. This is the case both for the biosynthetic  
67 pathways and for amino acid transport.

68 The genome of *B. subtilis* encodes 47 known and predicted amino acid transporters (Zhu and  
69 Stülke, 2018). For 19 of these transporters, substrates have been identified, and for four additional  
70 transporters, tentative substrates can be assigned based on mutant properties (for YbxG; Commichau  
71 *et al.*, 2015) and on the assignment to particular regulons (AlsT, YvbW, and YvsH; Randazzo *et al.*, 2017;  
72 Wels *et al.*, 2008; Rodionov *et al.*, 2003). No functional assignment can so far be made for eleven  
73 potential transporters. It is important to note that some proteins that are members of typical amino

74 acid transporter families do actually transport other substrates, such as the recently described  
75 potassium transporter KimA (Gundlach *et al.*, 2017). A complete overview on the known and potential  
76 amino acid transporters of *B. subtilis* can be found in Table S1 (see also [http://subtiwiki.uni-](http://subtiwiki.uni-goettingen.de/v3/category/view/SW%201.2)  
77 [goettingen.de/v3/category/view/SW%201.2](http://subtiwiki.uni-goettingen.de/v3/category/view/SW%201.2), Zhu and Stülke, 2018). Importantly, no transporters have  
78 so far been identified or proposed for alanine, glycine, serine, asparagine, and the aromatic amino  
79 acids phenylalanine and tyrosine. The identification of new amino acid transporters is hampered by  
80 two peculiarities: For one amino acid, there are often multiple transporters, as has been shown for  
81 arginine, proline, or the branched-chain amino acids (Calogero *et al.*, 1994; Gardan *et al.*, 1995;  
82 Sekowska *et al.*, 2001; Zaprasis *et al.*, 2014; Belitsky, 2015). On the other hand, many permeases have  
83 a relatively weak substrate specificity, i. e. they are able to transport multiple amino acids, as shown  
84 for BcaP or GltT (Belitsky 2015; Zaprasis *et al.*, 2015).

85         We are interested in the identification of the functions that are required to sustain the life of  
86 a minimal cell and in the corresponding set of genes and proteins. In an analysis of the genome of *B.*  
87 *subtilis*, amino acid transporters were proposed to be kept in a minimal genome rather than  
88 biosynthetic genes, since this would require fewer genes (Reuss *et al.*, 2016). However, as indicated  
89 above, no transporters have been identified for several amino acids. Accordingly, biosynthetic  
90 pathways were included for those amino acids. A minimal organism capable of transporting amino  
91 acids but not to produce them is expected to be viable on complex media but would be unable to grow  
92 on minimal medium in the absence of added amino acids. As minimal bacterial strains have a huge  
93 potential for biotechnological applications (Suárez *et al.*, 2019), the ability to produce amino acids may  
94 be important for growth on cheap minimal salts substrates.

95         Serine is an important amino acid because this molecule is a not only a building block for  
96 protein synthesis but also a precursor of nucleotides, phospholipids, redox molecules, and other amino  
97 acids. In addition, decreased level of intracellular serine can be a signal for initiation of biofilm  
98 formation in *B. subtilis* (Subramanian *et al.*, 2013), suggesting that regulation of serine homeostasis is  
99 very important. However, the metabolism of serine is not yet completely understood in *B. subtilis*. For

100 this amino acid, no transporter has been identified, and the knowledge of biosynthetic pathways has  
101 remained limited until recently. Indeed, the serine biosynthesis pathway has been completed just  
102 recently in the frame of a genome-scale deletion study by the identification of the SerB phosphoserine  
103 phosphatase that catalyzes the last step of the pathway (Koo *et al.*, 2017) (see Fig. 1 for an overview  
104 on serine metabolism in *B. subtilis*). Moreover, the reasons for serine toxicity have remained enigmatic.  
105 In *E. coli*, it has been suggested that serine binds and inactivates the bifunctional enzyme aspartate  
106 kinase/homoserine dehydrogenase (ThrA) (Mundhada *et al.*, 2017) thus interfering with threonine  
107 biosynthesis.

108 In this work, we have taken advantage of the serine toxicity phenotype of *B. subtilis* to devise  
109 reverse and forward genetic screens to identify serine transporters. Our analysis identified YbeC as the  
110 major serine transporter, and clarified the roles of threonine transporters in uptake of serine. Using a  
111 suppressor screen, we also isolated metabolic mutants that circumvent serine toxicity. These mutants  
112 exhibit either more efficient serine degradation or overexpression of genes for the threonine and  
113 isoleucine biosynthetic pathways suggesting that one or more enzymes in this pathway are inhibited  
114 by serine.

115

## 116 **Results**

117

### 118 *Overview of the genetic approaches used in this work*

119

120 All of our screens and selections were based on the fact that addition of serine to minimal medium is  
121 toxic for *B. subtilis* 168, whereas the addition of serine to complex LB medium did not interfere with  
122 growth of the bacteria. Moreover, the addition of specific amino acids such as threonine to minimal  
123 medium also overcomes serine toxicity (Vandeyar and Zahler, 1986; Lachowicz *et al.*, 1996). These  
124 observations suggest that intracellular serine interferes with amino acid metabolism. We might  
125 therefore expect that strains would become resistant to serine toxicity either by eliminating the major

126 serine transporter, or by altering amino acid metabolism of genes related to serine toxicity. To identify  
127 these genes, we used the following approaches:

128 **1. A targeted screen for transporters.** For this purpose, we chose twelve candidate  
129 transporters that met two criteria: First, these transporters have been poorly studied in *B. subtilis*, and  
130 second, they are expressed during vegetative growth. These transporters are AapA, AlST, MtrA, SteT,  
131 YbeC, YbgF, YdgF, YecA, YodF, and YtnA. Mutants for the corresponding genes (see Table S2) were  
132 constructed and analysed for the ability to grow in the presence of 244  $\mu$ M L-serine. While all strains  
133 were capable of growing on minimal medium in the absence of serine, only the *ybeC* mutant strain  
134 GP1886 was able to grow in the presence of serine, suggesting that YbeC might act as serine  
135 transporter.

136 **2. A suppressor screen aimed at identifying mutants altered in related amino acid**  
137 **metabolism.** We selected for loss of serine toxicity in the wild type strain and in a  $\Delta serA$  mutant that  
138 is auxotrophic for serine strain and depends on the uptake of serine for growth. Of eight studied  
139 suppressor strains, four were transporter (*ybeC*) mutants and the remaining strains exhibited genetic  
140 lesions related to amino acid metabolism. Interestingly, the *ybeC* mutation was also found in the *serA*  
141 mutant as a suppressor, indicating that serine can be transported in *ybeC* mutant.

142 **3. A screen of the entire *B. subtilis* deletion library for loss of serine toxicity.** In order to make  
143 sure that the screens described above were exhaustive, we also made use of the deletion library that  
144 encompasses all non-essential genes of *B. subtilis* (Koo *et al.*, 2017). In this library, each reading frame  
145 is replaced by an antibiotic cassette with a relatively strong outwardly facing promoter, so resistance  
146 to serine toxicity could result from gene deletion or from overexpression of downstream genes. To  
147 distinguish between these possibilities, we removed the antibiotic cassette and retested the  
148 phenotype. If the phenotype was retained following removal of the antibiotic cassette, then the  
149 phenotype was caused by gene deletion; if not it was likely due to overexpression of downstream  
150 genes. This screen identified both the transporter, YbeC, and genetic lesions related amino acid  
151 metabolism (Table 1).

152

153 *Identification of a permease that confers sensitivity to L-serine*

154

155 Both our targeted screen of the 13 expressed, uncharacterized transporters and our screen of the *B.*  
156 *subtilis* deletion library identified only a single putative transporter, YbeC, the loss of which conferred  
157 resistance to serine. Supporting the importance of YbeC, 50% of the mutants from the suppressor  
158 screen (Selection #2) had mutations targeting *ybeC*. Additionally, the *glpQ* mutant (BKE02130), a strain  
159 from the whole genome screen (Selection #3) that suppressed serine toxicity due to overexpression,  
160 likely generates an abundant *ybeC* antisense RNA (Table 1). The net effect of antisense expression is  
161 to decrease *ybeC* expression, explaining its serine resistance phenotype.

162 To test whether the *ybeC* mutant is also resistant to higher concentrations of serine, we  
163 cultivated the mutant GP1886 at increasing serine concentrations (up to 100 mM), and recorded  
164 growth of the bacteria. While the wild type strain was unable to grow at concentrations exceeding 244  
165  $\mu$ M, the *ybeC* mutant was able to tolerate as much as 11 mM serine (see Table 2). In addition to serine,  
166 the anti-metabolite serine hydroxamate also inhibits growth of *B. subtilis*. To test whether loss of YbeC  
167 allows growth in the presence of this serine analogue, we cultivated the wild type strain 168 and the  
168 *ybeC* mutant GP1886 in the presence of DL-serine hydroxamate (1 mg/ml). As shown in Fig. 2A, the  
169 wild type was sensitive to this molecule whereas the *ybeC* mutant was somewhat more resistant. Thus,  
170 loss of YbeC confers resistance to both serine and its toxic analogue serine hydroxamate, suggesting  
171 that the protein is a serine transporter.

172

173 *Isolation and initial characterization of mutants that are able to grow in the presence of serine*

174

175 The targeted analysis of potential amino acid transporters identified YbeC as the only candidate serine  
176 transporter. In an attempt to identify more genes involved in serine toxicity, we cultivated the *B.*  
177 *subtilis* wild type strain 168 in the presence of different concentrations of serine. Moreover, we used

178 the serine auxotrophic *serA* mutant that depends on the uptake of serine for growth, and the *ybeC*  
179 mutant that already tolerates up to 11 mM of serine (see above). In total, we isolated eight mutants  
180 that exhibited increased resistance to serine in five distinct selection experiments. One mutant for  
181 each selection was subjected to whole genome sequencing to identify the underlying mutations. In  
182 one of the mutants (GP2324, isolated from the wild type 168 at 1 mM serine), a *ybeC* mutation was  
183 detected. Thus, we tested the remaining mutants for the presence of mutations in *ybeC*. Strikingly,  
184 four out of the eight mutants had acquired mutations in *ybeC*. These mutations resulted in the  
185 production of truncated and therefore possibly inactive YbeC proteins or in an in-frame deletion of 236  
186 amino acids (in GP3050). The identification of multiple suppressor mutants affecting YbeC strongly  
187 supports the crucial role of YbeC in the resistance to serine.

188         Of the serine-resistant strains whose phenotype was not caused by a *ybeC* mutation, two  
189 strains derived from the wild type strain 168 had a duplication of the about 16 kb *yokD-thyB*  
190 chromosomal region. Interestingly, this region contains the *ilvA* gene encoding threonine dehydratase  
191 involved in the biosynthesis of isoleucine from threonine. The remaining three mutants (derived from  
192 the *serA* mutant, and the *ybeC* mutant at 10 and 17 mM serine, see Table S2 for details) had mutations  
193 affecting the repressor for the threonine biosynthetic genes, *thrR* (Rosenberg *et al.*, 2016), and  
194 mutations in the regulatory regions of the *sdaAB* and *hom* promoter regions, respectively (Table S2).  
195 All these genes are involved in serine and threonine metabolism suggesting a close relation between  
196 the metabolic pathways for these similar amino acids (see below for further analyses).

197

198 *YbeC is a serine transporter*

199

200 All three targeted and unbiased analyses of serine-resistance mutants identified YbeC as the main  
201 player. YbeC is similar to known amino acid transporters, is classified as a member of the amino acid-  
202 polyamine-organocation superfamily (see Table S1), and the *ybeC* mutant had the phenotypes  
203 expected for a major serine transporter. To test this idea, we made use of an *E. coli* mutant that lacks



204 the major serine transporter SstT. This strain is less sensitive to growth inhibition by serine (Ogawa *et*  
205 *al.*, 1997; Ogawa *et al.*, 1998). We cloned the *ybeC* gene into the expression vector pWH844 and used  
206 the resulting plasmid pGP2987 to transform the *sstT* mutant JW3060 (Baba *et al.*, 2006). Indeed, the  
207 expression of plasmid-borne *ybeC* in *E. coli* JW3060 restored serine toxicity (Fig. 2B). Taken together,  
208 both the genetic characterization and the functional complementation of an *E. coli* mutant lacking a  
209 serine transporter demonstrate that YbeC is indeed a transporter for serine.

210 The *ybeC* gene forms a monocistronic transcription unit (Nicolas *et al.*, 2012). To study the  
211 activity of the *ybeC* promoter and its possible regulation by serine, a 257 bp region (222 bp upstream  
212 of the ATG translational start codon, and 35 bp of the *ybeC* coding region) was fused to a promoterless  
213 *lacZ* gene. The resulting strain, GP2965, was cultivated in minimal in the presence and absence of  
214 serine as well as in complex (LB) medium. With very similar  $\beta$ -galactosidase activities ( $144 \pm 2$ ,  $132 \pm 8$ ,  
215 and  $135 \pm 10$  units per mg of protein, respectively), this fusion was similarly expressed irrespective of  
216 the presence of serine in the medium thus indicating constitutive expression of *ybeC*.

217

218 *Serine and threonine share overlapping transporters*

219

220 **Threonine transporters contribute to serine uptake.** The identification of viable *serA ybeC* mutants in  
221 the suppressor screen (Screen #2 above) suggested either that the mutant YbeC proteins retained  
222 some transport activity or that YbeC is not the only transporter for serine. To resolve this issue, we  
223 deleted the *ybeC* gene in the *serA* mutant which is auxotrophic for serine. The resulting double mutant  
224 GP2941 depends on serine uptake for viability. Analysis of growth of these mutants demonstrated that  
225 both the *serA* mutant and the *serA ybeC* double mutant were unable to grow in the absence of serine  
226 (C-glucose medium). In contrast, the strains lacking the *ybeC* gene were able to grow in minimal  
227 medium supplemented with serine (see Fig. 3A). Thus, the  $\Delta ybeC$  mutant is still able to transport  
228 serine.

229 Serine and threonine are chemically similar to each other and the *E. coli* SstT transporter is  
230 capable of transporting both serine and threonine (Kim *et al.*, 2002). Therefore, we considered the  
231 possibility that threonine transporters might contribute to serine uptake in *B. subtilis*, and *vice versa*.  
232 Based on the analysis of growth inhibition by threonine and its analogue 4-hydroxythreonine, the BcaP  
233 and YbxG permeases have been identified as tentative threonine transporters in *B. subtilis* (see Table  
234 S1, Belitsky 2015; Commichau *et al.*, 2015). To test the possible role of these permeases in serine  
235 transport, we used single, double and triple mutants lacking *ybeC*, *bcaP*, and *ybxG*, respectively. The  
236 resulting strains were assayed for their resistance towards serine. As shown in Fig. 3B, the single *bcaP*  
237 and *ybxG* deletions conferred only a weak resistance to growth inhibition by serine, whereas the loss  
238 of *ybeC* resulted in a substantial resistance (see also Table 2). This observation confirms that YbeC is  
239 the main transporter for serine in *B. subtilis*.

240 The double mutants lacking YbeC and one of the threonine transporters exhibited a substantial  
241 increase in resistance to serine indicating that both threonine permeases contribute to serine  
242 transport (see Table 2). In contrast, the *bcaP ybxG* double mutant was much more sensitive to serine  
243 than the *ybeC* mutant. This observation supports the conclusion that YbeC is the major serine  
244 permease. The analysis of double mutants lacking YbeC and either YbxG or BcaP indicates that the loss  
245 of BcaP has a higher contribution to serine resistance as compared to the loss of YbxG (Table 2,  
246 compare GP2951 and GP2949). This indicates that BcaP may be more active in serine transport than  
247 YbxG. The deletion of the three permease-encoding genes in the triple mutant GP2950 resulted in an  
248 unprecedented resistance to serine up to 100 mM (Table 2). This finding indicates that these three  
249 proteins may be responsible for the majority of serine uptake in *B. subtilis*. If these proteins were the  
250 only serine permeases, one would expect that an auxotrophic *serA* mutant lacking the three permeases  
251 would not be viable. However, this mutant (GP2955) was still able to grow on minimal medium in the  
252 presence of serine (Fig. 3C). Thus, *B. subtilis* possesses at least one additional permease that is able to  
253 transport serine.

254 **Analysis of threonine transport.** Our findings demonstrate that the two previously suggested  
255 threonine transporters are also active as minor serine permeases. Next, we asked whether YbeC is also  
256 capable of transporting threonine. To address this question, we made use of the observation that  
257 threonine is toxic for *B. subtilis* if added in concentrations exceeding 50 µg/ml (Lamb and Bott, 1979a;  
258 Lamb and Bott, 1979b). In our experimental setup, threonine (10 mM) inhibits growth of *B. subtilis*  
259 168. Inactivation of the *bcaP* gene conferred a growth advantage, the *bcaP* mutant grew in the  
260 presence of threonine as well as the wild type strain in the absence of this amino acid. In contrast, the  
261 deletions of *ybxG* or *ybeC* had only minor effects (Fig. 4A). This observation is supported by the analysis  
262 of the double and triple mutants: While all mutants lacking *bcaP* showed threonine-resistant growth,  
263 this was not the case for the *ybeC ybxG* double mutant GP2952 that still expresses BcaP (Fig. 4B). These  
264 observations suggest that BcaP is the main threonine transporter in *B. subtilis*.

265 In order to test the presence of additional threonine transporters, and to get further evidence  
266 for the relative roles of BcaP, YbxG, and YbeC in threonine uptake, we deleted the *thrC* gene in the wild  
267 type 168 and in relevant transporter mutants. The *thrC* gene codes for threonine synthase which  
268 catalyzes the final step in threonine biosynthesis. As expected, the *thrC* mutant was auxotrophic for  
269 threonine (data not shown). The deletion of *bcaP* alone or in combination with *ybeC* resulted in  
270 improved growth both at 0.04 and 4 mM threonine as compared to the single *thrC* mutant (see Fig. 5).  
271 The combination of the *thrC*, *ybeC* and *ybxG* mutations had no effect as compared to the single *thrC*  
272 deletion supporting the idea that YbeC and YbxG play only very minor roles in threonine uptake.  
273 However, the simultaneous deletion of *bcaP* and *ybxG* in the *thrC* mutant resulted in severely reduced  
274 growth at 0.04 mM threonine (Fig. 5A). The additional deletion of *ybeC* had only a minor, if any impact.  
275 These findings suggest that BcaP and YbxG act as threonine transporters. Importantly, the *thrC* mutant  
276 lacking BcaP and YbxG (and YbeC) is still able to grow in the presence of threonine suggesting the  
277 existence of at least one additional threonine transporter (Fig. 5A and 5B).

278 Taken together, these results indicate that BcaP is the major threonine transporter in *B.*  
279 *subtilis*, whereas YbxG has a minor threonine permease activity. Our data do not support the

280 annotation of YbeC as a threonine transporter. Moreover, BcaP and YbxG have overlapping activity for  
281 both serine and threonine (see Fig. 1).

282

283 *Putting serine toxicity in its metabolic context*

284

285 As mentioned above, the addition of serine to minimal medium is toxic, whereas its addition to  
286 complex LB medium did not interfere with growth of *B. subtilis* 168 (data not shown). The inactivation  
287 of the *ybeC* gene to prevent serine uptake or the addition of several individual amino acids such as  
288 threonine overcome serine toxicity (Vandeyar and Zahler, 1986; Lachowicz *et al.*, 1996). These  
289 observations suggest that intracellular serine interferes with amino acid metabolism. Mutants from  
290 the suppressor screen (Selection #2) and from the genome wide screen (Selection #3) shed light on the  
291 origins of serine toxicity.

292

293 **The role of serine deaminase in overcoming serine toxicity.** The *sdaAB-sdaAA* operon encodes the  
294 two subunits of serine deaminase, which catalyzes the degradation of serine to pyruvate and ammonia  
295 (Chen *et al.*, 2012). Both the suppressor screen (Selection #2) and the whole genome screen (Selection  
296 #3) identified overexpression of *sdaAB-sdaAA* as relieving serine toxicity. In the suppressor screen,  
297 strain GP2971 had a mutation 70 bp upstream of the start of the *sdaAB* coding sequence suggesting  
298 that it might affect expression of the operon. Indeed, a promoter has been identified in the 139 bp  
299 intergenic region between the *yloV* and *sdaAB* genes (Nicolas *et al.*, 2012). To test this hypothesis, we  
300 fused the 166 bp wild type and mutant regions that contain the complete *yloV-sdaAB* intergenic region,  
301 and thus the *sdaAB* promoter, to a promoterless *lacZ* gene, and compared the gene expression driven  
302 by these promoters. The strains carrying the *lacZ* fusions integrated into the *amyE* gene were cultivated  
303 in minimal medium, and their  $\beta$ -galactosidase activities were determined. For the wild type promoter,  
304 we detected  $7.4 \pm 2.2$  units of  $\beta$ -galactosidase per mg of protein. This corresponds to a very weak  
305 promoter activity (Schilling *et al.*, 2007). Expression of the *lacZ* gene from the mutant promoter

306 resulted in  $370 \pm 48$  units of  $\beta$ -galactosidase per mg of protein. Thus, the mutation resulted in a 50-  
307 fold increase of promoter activity. A closer inspection of the sequence around the mutation suggests  
308 that a TTGCCA sequence had been altered to the perfect -35 sequence, TTGACA. It is tempting to  
309 speculate that this perfect -35 region is responsible for the higher expression of the *sdaAB-sdaAA*  
310 operon and thus for higher intracellular levels of serine deaminase in the mutant. This conclusion is  
311 strongly supported by two mutants from the whole genome screen, affected in *yloV* (BKE15840) and  
312 *yloU* (BKE15830) that suppressed serine toxicity due to overexpression of the *sdaAB-sdaAA* operon.  
313 These strains have their antibiotic cassettes with the strong outwardly facing promoter immediately  
314 upstream of *sdaAB-sdaAA*, indicating that their overexpression suppresses serine toxicity (Table 1).  
315 The increased degradation of serine by serine deaminase is likely to be responsible for the protective  
316 action observed upon overexpression of this enzyme.

317

318 **The role of threonine metabolism in serine toxicity.** Two different loci related to threonine  
319 metabolism were identified in our screens. First, the suppressor screen identified a duplication of the  
320 16 kb *yokD-thyB* region containing *ilvA* as relieving serine toxicity. Second, both the whole genome and  
321 suppressor screens (Selection #2, 3) identified overexpression of the *hom-thrC-thrB* operon as relieving  
322 serine toxicity.

323 The threonine dehydratase IlvA uses threonine in the initial step of isoleucine biosynthesis. We  
324 observed a duplication of the approximately 16 kb *yokD-thyB* genomic region encompassing *ilvA* in two  
325 suppressor strains. This observation implies that IlvA may become limiting in the presence of serine or  
326 contribute to scavenging excess serine. If IlvA is inhibited by serine, this could be compensated by  
327 overexpression of *ilvA* gene (due to genomic duplication) or by increased synthesis of ThrC with its  
328 moonlighting activity as threonine dehydratase (Skarstedt and Greer, 1973; Rosenberg *et al.*, 2016)  
329 (see Fig. 1) which resumes isoleucine synthesis. However, this is unlikely since supplementation of  
330 isoleucine does not reduce serine toxicity (data not shown). Thus, it is more likely that *B. subtilis* IlvA  
331 may also have serine dehydratase activity, resulting in deamination of serine as has been shown in

332 *Salmonella enterica* and *E. coli* (Borchert and Downs, 2018). To test whether *IlvA* is a major  
333 determinant for serine resistance in these suppressor strains, we overexpressed the *ilvA* gene in the  
334 wild type strain 168 using the expression vector pGP2289 (see Fig. 6). Indeed, *ilvA* overexpression  
335 provided resistance to serine. However, the level of resistance of the overexpressing strain was lower  
336 than observed for the original suppressor mutation with the genomic duplication (see Discussion).

337 Both the whole genome and suppressor screens identified inactivation of the ThrR repressor  
338 and overexpression of one of its target operons, *hom-thrC-thrB* as relieving serine toxicity. The  
339 suppressor screen (Selection #2) identified a mutation in *thrR* and a mutation upstream of the *hom-*  
340 *thrC-thrB* operon. The inspection of the mutation in the *hom* upstream region revealed that this  
341 mutation did affect the ThrR binding site (Rosenberg *et al.*, 2016). Moreover, the *thrR* mutation  
342 (deletion of A91) resulted in a frame-shift and translation stop after 35 amino acids. This truncation  
343 has been observed previously in a different context. It results in an inactive ThrR protein (Rosenberg  
344 *et al.*, 2016). This suggests that both the *thrR* and the *hom* promoter region mutations result in  
345 increased expression of the *hom-thrC-thrB* operon. To test this idea, we tested the activity of the wild  
346 type and mutant *hom* promoters using *hom-lacZ* fusions. Strains carrying these fusions were grown in  
347 minimal medium and their  $\beta$ -galactosidase activities were assayed. For the wild type promoter, we  
348 detected  $275 \pm 35$  units of  $\beta$ -galactosidase per mg of protein, whereas the mutant promoter resulted  
349 in  $970 \pm 85$  units of  $\beta$ -galactosidase per mg of protein. These values are similar to those determined  
350 previously for the wild type *hom* promoter and for promoter variants that carry mutations in the ThrR  
351 binding site (Rosenberg *et al.*, 2016). Thus, these mutations allow an increased expression of the *hom-*  
352 *thrC-thrB* operon. These findings are supported by the results from the whole genome screen  
353 (Selection #3): The screen identified a strain with a *thrR* deletion and as well as overexpression of the  
354 *hom-thrC-thrB* operon originating from *yutH*, which is adjacent to the *hom-thrC-thrB* operon as  
355 relieving serine toxicity (Table 1).

356           Taken together, our results suggest that serine might cause defects in threonine and isoleucine  
357 biosynthesis. The defects can be overcome by reducing serine uptake, by degradation of serine, or by  
358 an adjustment of threonine and isoleucine metabolism.

359

## 360 **Discussion**

361 Metabolite toxicity is one of the least understood areas in the field of microbial metabolism. However,  
362 toxic metabolites pose major problems if metabolic pathways are assembled for biotechnological  
363 applications or when approaching genome minimization (Commichau *et al.*, 2015; Reuss *et al.*, 2016).  
364 For *B. subtilis*, only recently significant effort has been put into the elucidation of resistance  
365 mechanisms that allow the bacterium to cope with toxic metabolic intermediates and substrates  
366 (Lambrecht *et al.*, 2012; Commichau *et al.*, 2015; Niehaus *et al.*, 2017; Niehaus *et al.*, 2018; Sachla and  
367 Helmann, 2019).

368           In this work, we isolated *B. subtilis* mutants that are able to grow in minimal medium  
369 supplemented with the toxic amino acid serine using three different approaches, i. e. (i) a targeted  
370 screen, (ii) an unbiased suppressor screen, and (iii) a whole genome screen. Our two laboratories  
371 initiated this project independently starting with different aims, the identification of serine transporter  
372 and understanding the origin of serine toxicity, but the information obtained from all three strategies  
373 was highly similar and complementary. The convergence of the results from the unbiased and the  
374 genome-wide screens strongly suggests that the screens were saturating and that we have elucidated  
375 the complete portfolio of possibilities that allows *B. subtilis* to cope with otherwise toxic serine  
376 concentrations.

377           All three different screens identified YbeC as the major serine transporter in *B. subtilis*.  
378 Moreover, this transporter works well in *E. coli* in which YbeC restores serine sensitivity of a *sstT*  
379 mutant. Three features make the identification of amino acid transporters difficult: First, bacteria  
380 usually contain multiple transporters for one amino acid, often high and low affinity transporters that  
381 allow optimal uptake at a wide range of substrate concentrations. In *B. subtilis*, this is the case for

382 arginine, the branched-chain amino acids, glutamine, proline, and threonine. Second, the amino acid  
383 transporters are often not highly specific, i. e. they are able to transport multiple substrates as has  
384 been shown for BcaP and GltT in *B. subtilis*. BcaP transports the branched-chain amino acids isoleucine  
385 and valine as well as threonine (Belitsky 2015; Commichau *et al.*, 2015, this work), whereas GltT is  
386 involved in the uptake of aspartate, glutamate and the toxic product glyphosate (Zaprasis *et al.*, 2015;  
387 Wicke *et al.*, 2019). Finally, amino acid transporters are often members of families of closely related  
388 proteins, and based on sequence comparison it is often difficult to predict substrates. For example, the  
389 branched chain amino acid transporter BcaP is a paralog of the methylthioribose transporter MtrA,  
390 and the KimA protein that is member of the amino acid-polyamine-organocation (APC) superfamily  
391 (see Table S1) does actually transport potassium (Gundlach *et al.*, 2017). With YbeC and serine uptake,  
392 we had to deal with all these challenges: While YbeC is the major transporter for serine, it is not the  
393 only one. Our study demonstrates that the BcaP and YbxG transporters that can transport threonine,  
394 do also contribute to serine uptake; however, their contribution is rather minor, as can be judged from  
395 the analysis of resistance of transporter mutants to serine. Even in the absence of YbeC, YbxG, and  
396 BcaP, *B. subtilis* is still able to transport serine from the medium indicating the presence of yet  
397 additional serine transporters. Moreover, all three transporters involved in serine uptake have  
398 paralogs in *B. subtilis*, which might be responsible for the residual serine uptake in the *ybeC ybxG bcaP*  
399 triple mutant that is highly resistant to serine (see Table 2). The promiscuity of amino acid transporters  
400 is important for genome minimization projects (Reuss *et al.*, 2016, Reuss *et al.*, 2017). For example,  
401 BcaP alone would be sufficient to transport at least four amino acids. Thus, genes encoding additional  
402 transporters for these amino acids (including *ybeC*) can be deleted as well as the corresponding  
403 biosynthetic pathways. It seems that nature has already put this reduction of amino acid acquisition  
404 to very few transporters into reality: the highly genome-reduced *Mycoplasma* species have lost the  
405 ability to produce amino acids and therefore depend completely on their uptake from the medium.  
406 Due to the fast evolution of this group of bacteria, it has so far not been possible to identify amino acid  
407 transporters based on sequence similarity. However, the independent life of the artificial genome-



408 reduced organism *Mycoplasma mycoides* JCVI-syn3.0 (Hutchison *et al.*, 2016) indicates that this  
409 minimal bacterium possesses a complete set of amino acid transporters.

410         The toxicity of serine can not only be mitigated by the loss of the major serine transporter,  
411 YbeC. In addition, our screens also identified other ways to cope with increased serine concentrations,  
412 *i. e.* (i) the rapid conversion of serine to other metabolites, mostly pyruvate and (ii) the overexpression  
413 of genes involved in the synthesis of threonine (the *hom-thrC-thrB* operon). The serine deaminase  
414 complex SdaAA-AB converts serine to pyruvate and ammonia, thus detoxifying excess serine as well as  
415 allowing cells to use serine as carbon and nitrogen source. It is therefore not surprising that removal  
416 of this enzyme activity was attempted to increase the yield of serine production in *E. coli* (Li *et al.*,  
417 2012). On the other hand, it was reported that serine deaminase deficiency in *E. coli* resulted in  
418 abnormal cell division even in lysogeny broth medium (Zhang and Newman, 2008). Interestingly,  
419 strains overexpressing the *sda* operon were most highly enriched from the genome-wide pool of *B.*  
420 *subtilis* transposon insertion mutants if the library was grown in minimal medium supplemented with  
421 toxic concentration of serine (data not shown), likely because serine uptake is not limited but rapid  
422 conversion to pyruvate and ammonia provides both carbon and nitrogen source in these strains.

423         There are a couple of ways in which increased expression of the *hom-thrC-thrB* operon could  
424 suppress serine toxicity. First, increased levels of threonine biosynthetic enzymes may produce more  
425 threonine. As the addition of threonine to serine-containing minimal medium can partially overcome  
426 serine toxicity, it is likely that serine addition deprives the cell of threonine, which can be overcome  
427 either by increased threonine synthesis or by external supplementation. Second, L-serine toxicity in *E.*  
428 *coli* works by inhibiting both the aspartate kinase and homoserine dehydrogenase activity of the fused  
429 enzyme ThrA (Costrejaen and Truffa-Bachi, 1977), and may function analogously in *B. subtilis*.  
430 Consistent with this idea, we found that supplementation of homoserine restored the growth of wild  
431 type *B. subtilis* in the presence of serine (data not shown). Biochemical analysis with purified *B. subtilis*  
432 homoserine dehydrogenase would provide clear evidence for this hypothesis. We attempted to purify  
433 *B. subtilis* homoserine dehydrogenase from *hom* overexpressing *E. coli* strain but failed to get active

434 enzyme. It is tempting to speculate that the increased expression of *ilvA* upon the duplication the *yokD-*  
435 *thyB* genomic region is the major determinant for serine resistant phenotype in this suppressor mutant  
436 since we observed that overexpression of *ilvA* phenocopied it, even though only partially (Fig. 6). One  
437 explanation for the incomplete effect of *IlvA* overexpression is that the enzyme not only suppresses  
438 serine toxicity, but also is itself toxic to cell possibly due to the accumulation of toxic levels of 2-  
439 oxobutanoate or 2-aminoacrylate (Borchert and Downs, 2018). Strikingly, the *ilvA* gene is present in  
440 two copies in the suppressor strain whereas it is present on multiple plasmid copies and expressed  
441 from a strong constitutive promoter in the artificial overexpression system. This may be too much of a  
442 good thing!

443 This study provides novel insights into important aspects of serine metabolism in *B. subtilis*  
444 and into its integration into the amino acid acquisition network. This network consists not only of  
445 biosynthetic enzymes with overlapping activities but also of the transporters that are often  
446 promiscuous and transport multiple amino acids. Our work provides a starting point for further analysis  
447 of the complex and interlocking set of proteins that carry out amino acid transport in *B. subtilis*.

448

## 449 **Methods**

450

### 451 *Bacterial strains and growth conditions*

452

453 All *B. subtilis* strains used in this work are derived from the laboratory wild type strain 168. They are  
454 listed in Table S2. *B. subtilis* was grown in LB (Lysogeny broth) medium, SP (sporulation) medium and  
455 in C minimal medium containing glucose and ammonium as basic sources of carbon and nitrogen,  
456 respectively (Commichau *et al.*, 2008). Minimal medium was supplemented with auxotrophic  
457 requirements (at 50 mg/l) and amino acids as indicated. Plates were prepared by the addition of 17 g  
458 Bacto agar/l (Difco) to the liquid medium. *E. coli* DH5 $\alpha$  and JW3060 (Sambrook *et al.*, 1989; Baba *et al.*,  
459 2006) were used for cloning and complementation experiments, respectively. JW3060 was grown in

460 M9 minimal medium (Sambrook *et al.*, 1989) with glucose (1% w/v) as the carbon source, but lacking  
461 casamino acids. Serine was added as indicated. For the determination of the tolerated serine  
462 concentrations, bacteria were grown in C glucose minimal medium to an OD<sub>600</sub> of 1.0 and plated on C-  
463 Glc plates containing a wide range of serine concentrations (1 to 100 mM). The growth was compared  
464 after incubation of the plates at 37°C for 48 hours.

465

#### 466 *DNA manipulation and genome sequencing*

467

468 Plasmid DNA extraction from *E. coli* were performed using standard procedures (Sambrook *et al.*,  
469 1989). Restriction enzymes, T4 DNA ligase and DNA polymerases were used as recommended by the  
470 manufacturers. *Fusion* DNA polymerase (Biozym, Germany) was used for the polymerase chain  
471 reaction as recommended by the manufacturer. DNA fragments were purified using the Qiaquick PCR  
472 Purification kit (Qiagen, Germany). DNA sequences were determined using the dideoxy chain  
473 termination method (Sambrook *et al.*, 1989). All plasmid inserts derived from PCR products were  
474 verified by DNA sequencing. Chromosomal DNA of *B. subtilis* was isolated as described (Commichau *et*  
475 *al.*, 2008). To identify the mutations in the suppressor mutant strains GP2324, GP2969, GP2970,  
476 GP2971, and GP2972 (see Table S2), the genomic DNA was subjected to whole-genome sequencing  
477 (Reuß *et al.*, 2019). Briefly, the reads were mapped on the reference genome of *B. subtilis* 168  
478 (GenBank accession number: NC\_000964) (Barbe *et al.*, 2009). Mapping of the reads was performed  
479 using the Geneious software package (Biomatters Ltd., New Zealand) (Kearse *et al.*, 2012). Single  
480 nucleotide polymorphisms were considered as significant when the total coverage depth exceeded 25  
481 reads with a variant frequency of  $\geq 90\%$ . All identified mutations were verified by PCR amplification and  
482 Sanger sequencing.

483

#### 484 *Transformation and phenotypic analysis*

485

486 Standard procedures were used to transform *E. coli* (Sambrook *et al.*, 1989) and transformants were  
487 selected on LB plates containing ampicillin (100 µg/ml). *B. subtilis* was transformed with plasmid or  
488 chromosomal DNA according to the two-step protocol described previously (Kunst and Rapoport,  
489 1995). Transformants were selected on SP plates containing chloramphenicol (Cm 5 µg/ml), kanamycin  
490 (Km 5 µg/ml), spectinomycin (Spc 150 µg/ml), or erythromycin plus lincomycin (Em 25 µg/ml and Lin  
491 25 µg/ml).

492 In *B. subtilis*, amylase activity was detected after growth on plates containing nutrient broth  
493 (7.5 g/l), 17 g Bacto agar/l (Difco) and 5 g hydrolyzed starch/l (Connaught). Starch degradation was  
494 detected by sublimating iodine onto the plates.

495 Quantitative studies of *lacZ* expression in *B. subtilis* were performed as follows: cells were  
496 grown in LB medium or in C glucose medium supplemented with serine as indicated. Cells were  
497 harvested at OD<sub>600</sub> of 0.6 to 0.8. β-Galactosidase specific activities were determined with cell extracts  
498 obtained by lysozyme treatment as described previously (Kunst and Rapoport, 1995). One unit of β-  
499 galactosidase is defined as the amount of enzyme which produces 1 nmol of o-nitrophenol per min at  
500 28° C.

501

#### 502 *Construction of deletion mutants*

503

504 Deletion of amino acid transporter and biosynthetic genes was achieved by transformation with PCR  
505 products constructed using appropriate oligonucleotides to amplify DNA fragments flanking the target  
506 genes and intervening antibiotic resistance cassettes (Guerot-Fleury *et al.*, 1995) as described  
507 previously (Wach, 1996).

508

#### 509 *Whole genome growth phenotype screen*

510

511 The screen was carried out as described previously (Koo *et al.*, 2017) with modifications that optimized  
512 screening for serine toxicity. Plates for screening were allowed to dry for two days. The BKE (Erm<sup>R</sup>)  
513 library was arrayed in 384-well plates using a Biomek FX liquid handling robot (Beckman Coulter) and  
514 stored as glycerol stock. To screen the whole BKE library, cells were pinned from glycerol stocks onto  
515 rectangular LB agar plates in 384-format using a Singer Rotor robot, then four 384-format plates were  
516 combined and pinned to 1536-format. For each screen, exponentially growing cells in 1536-format  
517 were then pinned to glucose minimal agar plates (growth control) and glucose minimal plates  
518 supplemented with three different concentrations of L-serine (0.38, 0.75 and 1.5 mM). Then, plates  
519 were incubated at 37°C in a humidified incubator for about 24 to 44 hours. Plates were imaged using  
520 a Powershot G10 camera (Canon) and serine-resistant mutants were identified by their position in the  
521 plates. Each mutant was confirmed by sequencing of their barcodes.

522

### 523 *Plasmids*

524

525 Plasmid pAC5 (Martin-Verstraete *et al.*, 1992) was used to construct translational fusions of the *ybeC*,  
526 *sdaAB*, and *hom* control regions with the *lacZ* gene. For this purpose, the regions upstream of these  
527 genes were amplified using appropriate oligonucleotides. The PCR products were digested with *EcoRI*  
528 and *BamHI* PCR and cloned into pAC5 linearized with the same enzymes. The resulting plasmids were  
529 pGP2287 (*ybeC*), pGP2295 (*sdaAB*), pGP2294 (*sdaAB\**), pGP2296 (*hom\**).

530 For the expression of YbeC in *E. coli*, we constructed plasmid pGP2987. For this purpose the  
531 *ybeC* gene was amplified using chromosomal DNA of *B. subtilis* as a template. The PCR product was  
532 digested with *BamHI* and *Sall* and cloned into the expression vector pWH844 (Schirmer *et al.*, 1997).

533 For the expression of the threonine dehydratase *IlvA* in *B. subtilis*, plasmid pGP2289 was  
534 constructed by cloning a DNA fragment covering the *ilvA* gene between the *BamHI* and *Sall* restriction  
535 sites of the overexpression vector pBQ200 (Martin-Verstraete *et al.*, 1994).

536

537

## 538 **Acknowledgements**

539 We are grateful to Christina Herzberg for the help with some drop dilution assays and to Fabian M.  
540 Commichau for helpful discussions. This work was supported by the EU Horizons 2020 program  
541 (Rafts4Biotech, 720776 to J.S.), the Deutsche Forschungsgemeinschaft via priority program SPP1879  
542 (to J.S.) and the NIH (R35 GM118061 to C.A.G.).

543

## 544 **References**

545

546 Baba, T., Ara, T., Hasegawa, M., Takai, Y., Okumura, Y., *et al.* (2006) Construction of *Escherichia coli* K-  
547 12 in-frame, single-gene knockout mutants: the Keio collection. *Mol Syst Biol* **2**: 2006.0008.

548 Barbe, V., Cruveiller, S., Kunst, F., Lenoble, P., Meurice, G., *et al.* (2009) From a consortium sequence  
549 to a unified sequence: the *Bacillus subtilis* 168 reference genome a decade later. *Microbiology*  
550 **155**: 1758-1775.

551 Belitsky, B.R., and Sonenshein, A.L. (1998) Role and regulation of *Bacillus subtilis* glutamate  
552 dehydrogenase genes. *J Bacteriol* **180**: 6298-6305.

553 Belitsky, B.R. (2015) Role of branched-chain amino acid transport in *Bacillus subtilis* CodY activity. *J*  
554 *Bacteriol* **197**: 1330-1338.

555 Borchert, A.J., and Downs, D.M. (2018) Analyses of variants of the Ser/Thr dehydratase IlvA provide  
556 insight into 2-aminoacrylate metabolism in *Salmonella enterica*. *J Biol Chem* **293**: 19240-19249.

557 Calogero, S., Gardan, R., Glaser, P., Schweizer, J., Rapoport, G., and Débarbouillé, M. (1994) RocR, a  
558 novel regulatory protein controlling arginine utilization in *Bacillus subtilis*, belongs to the  
559 NtrC/NifA family of transcriptional activators. *J Bacteriol* **176**: 1234-1241.

560 Chen, S., Xu, X.L., and Grant, G.A. (2012) Allosteric activation and contrasting properties of L-serine  
561 dehydratase types 1 and 2. *Biochemistry* **51**: 5320-5328.

- 562 Commichau, F.M., Alzinger, A., Sande, R., Bretzel, W., Reuß, D.R., *et al.* (2015) Engineering *Bacillus*  
563 *subtilis* for the conversion of the antimetabolite 4-hydroxy-L-threonine to pyridoxine. *Metab*  
564 *Eng* **29**: 196-207.
- 565 Commichau, F.M., Gunka, K., Landmann, J.J., and Stülke, J. (2008) Glutamate metabolism in *Bacillus*  
566 *subtilis*: Gene expression and enzyme activities evolved to avoid futile cycles and to allow rapid  
567 responses to perturbations in the system. *J Bacteriol* **190**: 3557-3564.
- 568 Costrejean, J.M., and Truffa-Bachi, P. (1977) Threonine-sensitive homoserine dehydrogenase and  
569 aspartokinase activities of *Escherichia coli* K12. Kinetic and spectroscopic effects upon binding  
570 of serine and threonine. *J Biol Chem* **252**: 5332-5336.
- 571 Gardan R, Rapoport G, Débarbouillé M. 1995. Expression of the *rocDEF* operon involved in arginine  
572 catabolism in *Bacillus subtilis*. *J Mol Biol* 249:843-856.
- 573 Guérout-Fleury, A.M., Shazand, K., Frandsen, N., and Stragier, P. (1995) Antibiotic resistance cassettes  
574 for *Bacillus subtilis*. *Gene* **167**: 335-336.
- 575 Gundlach, J., Herzberg, C., Kaefer, V., Gunka, K., Hoffmann, T., *et al.* 2017. Control of potassium  
576 homeostasis is an essential function of the second messenger cyclic di-AMP in *Bacillus subtilis*.  
577 *Sci Signal* **10**: eaal3011.
- 578 Hutchison C.A. 3rd, Chuang R.Y., Noskov V.N., Assad-Garcia N., Deerinck T.J., *et al.* (2016) Design and  
579 synthesis of a minimal bacterial genome. *Science* **351**: aad6253.
- 580 Kearse, M., Moir, R., Wilson, A., Stones-Havas, S., Cheung, M., *et al.* (2012) Geneious basic: an  
581 integrated and extendable desktop software platform for the organization and analysis of  
582 sequence data. *Bioinformatics* **28**: 1647–1649.
- 583 Kim, Y.M., Ogawa, W., Tamai, E., Kuroda, T., Mizushima, T., and Tsuchiya, T. (2002) Purification,  
584 reconstitution, and characterization of Na(+)/serine symporter, SstT, of *Escherichia coli*. *J*  
585 *Biochem* **132**: 71-76.
- 586 Koo, B.M., Kritikos, G., Farelli, J.D., Todor, H., Tong, K., *et al.* (2017) Construction and analysis of two  
587 genome-scale libraries for *Bacillus subtilis*. *Cell Syst* **4**: 291-305.

- 588 Kunst, F., and Rapoport, G. (1995) Salt stress is an environmental signal affecting degradative enzyme  
589 synthesis in *Bacillus subtilis*. *J Bacteriol* **177**: 2403-2407.
- 590 Lachowicz, T.M., Morzejko, E., Panek, E., and Piątkowski, J. (1996) Inhibitory action of serine on growth  
591 of bacteria of the genus *Bacillus* on mineral synthetic media. *Folia Microbiol* **41**: 21-25.
- 592 Lamb, D.H., and Bott, K.F. (1979a) Threonine inhibition of growth of *Bacillus subtilis*: positive selection  
593 for isoleucine auxotrophy. *J Gen Microbiol* **111**: 433-435.
- 594 Lamb, D.H., and Bott, K.F. (1979b) Inhibition of *Bacillus subtilis* growth and sporulation by threonine. *J*  
595 *Bacteriol* **137**: 213-220.
- 596 Lambrecht, J.A., Flynn, J.M., and Downs, D.M. (2012) Conserved YjgF protein family deaminates  
597 reactive enamine/imine intermediates of pyridoxal 5'-phosphate (PLP)-dependent enzymes. *J*  
598 *Biol Chem* **287**: 3454-3461.
- 599 Li, Y., Chen, G.K., Tong, X.W., Zhang, H.T., Liu, X.G., Liu, Y.H., and Lu, F.P. (2012) Construction of  
600 *Escherichia coli* strains producing L-serine from glucose. *Biotechnol Lett* **34**: 1525-1530.
- 601 Martin-Verstraete, I., Débarbouillé, M., Klier, A., and Rapoport, G. (1992) Mutagenesis of the *Bacillus*  
602 *subtilis* "-12,-24" promoter of the levanase operon and evidence for the existence of an  
603 upstream activating sequence. *J Mol Biol* **226**: 85-99.
- 604 Martin-Verstraete, I., Débarbouillé, M., Klier, A., and Rapoport, G. (1994) Interactions of wild-type and  
605 truncated LevR of *Bacillus subtilis* with the upstream activating sequence of the levanase  
606 operon. *J Mol Biol* **241**: 178-192.
- 607 Mundhada, H., Seoane, J.M., Schneider, K., Koza, A., Christensen, H.B., *et al.* (2017) Increased  
608 production of L-serine in *Escherichia coli* through adaptive laboratory evolution. *Metab Eng*  
609 **39**: 141-150.
- 610 Nicolas, P., Mäder, U., Dervyn, E., Rochat, T., Leduc, A., *et al.* (2012) Condition-dependent  
611 transcriptome reveals high-level regulatory architecture in *Bacillus subtilis*. *Science* **335**: 1103-  
612 1106.



- 613 Niehaus, T.D., Elbadawi, M., de Crécy-Lagard, V., Fiehn, O., and Hanson, A.D. (2017) Discovery of a  
614 widespread prokaryotic 5-oxoprolinase that was hiding in plain sight. *J Biol Chem* **292**: 16360-  
615 16367.
- 616 Niehaus, T.D., Folz, J., McCarty, D.R., Cooper, A.J.L., Amador, D.M., Fiehn, O., and Hanson, A.D. (2018)  
617 Identification of a metabolic disposal route for the oncometabolite S-(2-succino)cysteine in  
618 *Bacillus subtilis*. *J Biol Chem* **293**: 8255-8263.
- 619 Ogawa, W., Kayahara, T., Tsuda, M., Mizushima, T., and Tsuchiya, T. (1997) Isolation and  
620 characterization of an *Escherichia coli* mutant lacking the major serine transporter, and cloning  
621 of a serine transporter gene. *J Biochem* **122**: 1241-1245.
- 622 Ogawa, W., Kim, Y.M., Mizushima, T., and Tsuchiya, T. (1998) Cloning and expression of the gene for  
623 the Na<sup>+</sup>-coupled serine transporter from *Escherichia coli* and characteristics of the transporter.  
624 *J Bacteriol* **180**: 6749-6752.
- 625 Randazzo, P., Aucouturier, A., Delumeau, O., and Auger, S. (2017) Revisiting the *in vivo* GlnR-binding  
626 sites at the genome scale in *Bacillus subtilis*. *BMC Res Notes* **10**: 422.
- 627 Reuß, D.R., Altenbuchner, J., Mäder, U., Rath, H., Ischebeck, T., Sappa, P.K., *et al.* (2017) Large-scale  
628 reduction of the *Bacillus subtilis* genome: consequences for the transcriptional network,  
629 resource allocation, and metabolism. *Genome Res* **27**: 289-299.
- 630 Reuß, D.R., Commichau, F.M., Gundlach, J., Zhu, B., and Stülke, J. (2016) The blueprint of a minimal  
631 cell: *MiniBacillus*. *Microbiol Mol Biol Rev* **80**: 955-987.
- 632 Reuß, D.R., Faßhauer, P., Mroch, P.J., Ul-Haq, I., Koo, B.M., *et al.* (2019) Topoisomerase IV can  
633 functionally replace all type 1A topoisomerases in *Bacillus subtilis*. *Nucleic Acids Res* **47**: 5231-  
634 5242.
- 635 Rodionov, D.A., Vitreschak, A.G., Mironov, A.A., and Gelfand, M.S. (2003) Regulation of lysine  
636 biosynthesis and transport genes in bacteria: yet another RNA riboswitch? *Nucleic Acids Res*  
637 **31**: 6748-6757.

- 638 Rosenberg, J., Müller, P., Lentjes, S., Thiele, M.J., Zeigler, D.R., *et al.* (2016) ThrR, a DNA-binding  
639 transcription factor involved in controlling threonine biosynthesis in *Bacillus subtilis*. *Mol*  
640 *Microbiol* **101**: 879-893.
- 641 Sachla, A.J., and Helmann, J.D. (2019) A bacterial checkpoint protein for ribosome assembly moonlights  
642 as an essential metabolite-proofreading enzyme. *Nat Commun* **10**: 1526.
- 643 Sambrook, J., Fritsch, E. F., and Maniatis, T. (1989) Molecular cloning: a laboratory manual, 2nd ed. Cold  
644 Spring Harbor Laboratory, Cold Spring Harbor, N.Y.
- 645 Schilling, O., Frick, O., Herzberg, C., Ehrenreich, A., Heinzle, E., *et al.* 2007. Transcriptional and  
646 metabolic responses of *Bacillus subtilis* to the availability of organic acids: Transcription  
647 regulation is important but not sufficient to account for metabolic adaptation. *Appl Environ*  
648 *Microbiol* **73**: 499-507.
- 649 Schirmer, F., Ehrt, S., and Hillen, W. (1997) Expression, inducer spectrum, domain structure, and  
650 function of MopR, the regulator of phenol degradation in *Acinetobacter calcoaceticus*  
651 NCIB8250. *J Bacteriol* **179**: 1329-1336.
- 652 Sekowska, A., Robin, S., Daudin, J.J., Hénaut, A., and Danchin, A. (2001) Extracting biological  
653 information from DNA arrays: an unexpected link between arginine and methionine  
654 metabolism in *Bacillus subtilis*. *Genome Biol* **2**:RESEARCH0019.
- 655 Skarstedt, M.T., and Greer, S.B. (1973) Threonine synthetase of *Bacillus subtilis*. *J Biol Chem* **248**: 1032-  
656 1044.
- 657 Suárez, R.A., Stülke, J., and van Dijk, J.M. (2019) Less is more: towards a genome-reduced *Bacillus* cell  
658 factory for “difficult proteins”. *ACS Synth Biol* **8**: 99-108.
- 659 Subramanian, A.R., DeLoughery, A., Bradshaw, N., Chen, Y., O’Shea, E., *et al.* (2013) A serine sensor for  
660 multicellularity in a bacterium. *eLife* **2**: 01501.
- 661 Vandeyar, M.A., and Zahler, S.A. (1986) Chromosomal insertions of Tn917 in *Bacillus subtilis*. *J Bacteriol*  
662 **167**: 530-534.

- 663 Wach, A. (1996) PCR-synthesis of marker cassettes with long flanking homology regions for gene  
664 disruptions in *S. cerevisiae*. *Yeast* **12**: 259-265.
- 665 Wels, M., Groot Kormelink, T., Kleerebezem, M., Siezen, R.J., and Francke, C. (2008) An *in silico* analysis  
666 of T-box regulated genes and T-box evolution in prokaryotes, with emphasis on prediction of  
667 substrate specificity of transporters. *BMC Genomics* **9**: 330.
- 668 Wicke, D., Schulz, L.M., Lentjes, S., Scholz, P., Poehlein, A., Gibhardt, J., *et al.* (2019) Identification of  
669 the first glyphosate transporter by genomic adaptation. *Environ Microbiol* **21**: 1287-1305.
- 670 Zapras, A., Hoffmann, T., Stanek, L., Gunka, K., Commichau, F.M., and Bremer, E. (2014) The  $\gamma$ -  
671 aminobutyrate permease GabP serves as the third proline transporter of *Bacillus subtilis*. *J*  
672 *Bacteriol* **196**: 1330-1338.
- 673 Zapras, A., Bleisteiner, M., Kerres, A., Hoffmann, T., and Bremer, E. (2015) Uptake of amino acids and  
674 their metabolic conversion into the compatible solute proline confers osmoprotection to  
675 *Bacillus subtilis*. *Appl Environ Microbiol* **81**: 250-259.
- 676 Zhang, X. and Newman, E. (2008) Deficiency in L-serine deaminase results in abnormal growth and cell  
677 division of *Escherichia coli* K-12. *Mol Microbiol* **69**: 870-881.
- 678 Zhu, B., and Stülke, J. (2018) *SubtiWiki* in 2018: From genes and proteins to functional network  
679 annotation of the model organism *Bacillus subtilis*. *Nucleic Acids Res* **46**: D743-D748.
- 680
- 681
- 682
- 683

684 **Table 1.** Serine resistant mutants identified from the genome-wide screen

| Strain*             | Genetic context                                                          | Serine resistance | Determinant for serine resistance    |
|---------------------|--------------------------------------------------------------------------|-------------------|--------------------------------------|
| <i>ΔybeC::erm</i>   | <b>ybeC</b> >, <glpQ<glpT                                                | Yes               | Deletion of <i>ybeC</i>              |
| <i>ΔybeC::lox72</i> |                                                                          | Yes               |                                      |
| <i>ΔglpQ::erm</i>   | <b>ybeC</b> >, <glpQ<glpT                                                | Yes               | Inhibition of <i>ybeC</i> expression |
| <i>ΔglpQ::lox72</i> |                                                                          | No                |                                      |
| <i>ΔyloU::erm</i>   | <i>yloU</i> > <i>yloV</i> >, <b>sdaAB</b> > <b>sdaAA</b> > <i>recG</i> > | Yes               | Overexpression of <i>sdaAB-AA</i>    |
| <i>ΔyloU::lox72</i> |                                                                          | No                |                                      |
| <i>ΔyloV::erm</i>   | <i>yloU</i> > <i>yloV</i> >, <b>sdaAB</b> > <b>sdaAA</b> > <i>recG</i> > | Yes               | Overexpression of <i>sdaAB-AA</i>    |
| <i>ΔyloV::lox72</i> |                                                                          | No                |                                      |
| <i>ΔthrR::erm</i>   | <i>spo0B</i> > <i>obg</i> > <b>thrR</b> > <i>pheA</i> >                  | Yes               | Deletion of <i>thrR</i> ,            |
| <i>ΔthrR::lox72</i> |                                                                          | Yes               | <i>overexpression of hom-thrCB</i>   |
| <i>ΔyutH::erm</i>   | <i>yutH</i> >, <b>hom</b> > <i>thrC</i> > <i>thrB</i> >                  | Yes               | Overexpression of <i>hom-thrCB</i>   |
| <i>ΔyutH::lox72</i> |                                                                          | No                |                                      |

685

686 \* *lox72* indicates the scar resulting from looping out of erythromycin -resistant cassette.

687

688

689 **Table 2:** Resistance of selected *B. subtilis* mutants towards serine.

690

| Strain   | Relevant genotype                     | Tolerated serine concentration (mM) <sup>1</sup> |
|----------|---------------------------------------|--------------------------------------------------|
| 168      | Wild type                             | < 1                                              |
| GP2786   | $\Delta ybeC$                         | 11                                               |
| BKE09460 | $\Delta bcaP$                         | 2                                                |
| GP2396   | $\Delta ybxG$                         | 1.5                                              |
| GP2949   | $\Delta ybeC \Delta bcaP$             | 40                                               |
| GP2951   | $\Delta ybeC \Delta ybxG$             | 25                                               |
| GP2952   | $\Delta bcaP \Delta ybxG$             | 4                                                |
| GP2950   | $\Delta ybeC \Delta bcaP \Delta ybxG$ | 100                                              |

691

692 <sup>1</sup> The tolerated serine concentrations were determined by cultivating the strains in liquid C Glc  
693 minimal medium in the presence of different serine concentrations. Note that the results obtained  
694 with plates and liquid medium can differ slightly.

695

696 **Figure legends**

697

698 **Fig. 1. Serine and threonine metabolic pathways in *B. subtilis*.** The model shows the relevant  
699 transporters, the biosynthesis of threonine, and its role as precursor for isoleucine biosynthesis as well  
700 as the pathways for serine biosynthesis and degradation.

701

702 **Fig. 2. YbeC is a serine transporter. A.** Sensitivity of the wild type strain 168 and the *ybeC* deletion  
703 mutant to serine and the toxic serine analogue DL-serine hydroxamate. Cells of the wild type 168 and  
704 the *ybeC* deletion mutant were grown in C-Glc minimal medium to an OD<sub>600</sub> of 1.0 and serial dilutions  
705 (10-fold) were prepared. These samples were plated on C-Glc minimal plates containing no serine, 1  
706 mM serine or 8mM DL-serine hydroxamate. The plates were incubated at 37°C for 48 h. **B.** Serine  
707 transport complementation assay in *E. coli*. The growth of the *E. coli sstT* mutant JW3060 harboring  
708 the empty vector (pWH844) was compared to the growth of JW3060 with a plasmid encoding the full-  
709 length YbeC (pGP2987) or YbeC without the C-terminus (pGP2988) on M9 minimal plates in the  
710 presence and absence of serine. The plates were incubated at 37°C for 48 h.

711

712 **Fig. 3. The contribution of threonine transporters to serine uptake.** Cells of the indicated strains were  
713 grown in C-Glc minimal medium to an OD<sub>600</sub> of 1.0 and serial dilutions (10-fold) were prepared. These  
714 samples were plated on C-Glc minimal plates containing no serine or 1 mM serine. The plates were  
715 incubated at 37°C for 48 h. **A.** Combination of the *ybeC* deletion with the deletion of the *serA* gene  
716 encoding phosphoglycerate dehydrogenase. The growth of the single deletion mutants of *ybeC*  
717 (GP1886) and *serA* (GP2392) was compared to the growth of the combined deletion strain of *ybeC* and  
718 *serA* (GP2941). **B.** The resistance of the threonine transporter deletion strains to serine. The *bcaP*  
719 (BKE09460) and *ybxG* deletion strains (GP2396) are compared to the wild type strain 168 and the *ybeC*  
720 deletion strain (GP1886). **C.** Combination of the *serA* deletion with the deletion strain of *bcaP*, *ybeC* and

721 *ybxG*. The growth of the wild type strain 168 was compared to GP2392 (*serA*), GP2955 (*serA bcaP ybeC*  
722 *ybxG*) and GP2950 (*bcaP ybeC ybxG*).

723

724 **Fig. 4. The growth inhibition by threonine. A** The single deletion strains for *ybeC* (GP1886), *bcaP*  
725 (BKE09460) and *ybxG* (GP2396) were grown in C-glc medium with 10 mM threonine in comparison to  
726 the wild type strain 168 and the wild type strain 168 in C-glc medium without threonine. **B** The growth  
727 of the double deletion mutants *bcaP ybeC* (GP2949), *ybeC ybxG* (GP2951) and *bcaP ybxG* (GP2952) was  
728 compared to the growth of the *bcaP ybeC ybxG* deletion strain and the wild type strain 168 in C-glc  
729 medium with 10 mM threonine.

730

731 **Fig. 5. Growth of the auxotrophic strains in combination with transporter deletions in the presence**  
732 **of different amounts of threonine.** The growth of the deletion strains GP3031 (*thrC bcaP*), GP3035  
733 (*thrC bcaP ybeC*), GP3036 (*thrC ybeC ybxG*), GP3034 (*thrC bcaP ybxG*) and GP3037 (*thrC bcaP ybeC*  
734 *ybxG*) was compared to the *thrC* deletion mutant (GP3030) in C-glc medium with 0.04 mM threonine  
735 (A) and 4 mM threonine (B).

736

737 **Fig. 6. Serine resistance of the *thrR* deletion mutant and the *ilvA* overexpression strain.** The growth  
738 of the wild type strain 168 and the mutant strains BKE27910 (*thrR*), GP1886 (*ybeC*), GP2970  
739 (Suppressor with (*yokD-thyB*) duplication) and the wild type 168 with the plasmid pGP2289 (*ilvA*  
740 overexpression) was compared on C-Glc minimal medium plates (10-fold serial dilution) containing 244  
741  $\mu$ M or 1 mM serine. The plates were incubated for 48 h at 37°C.

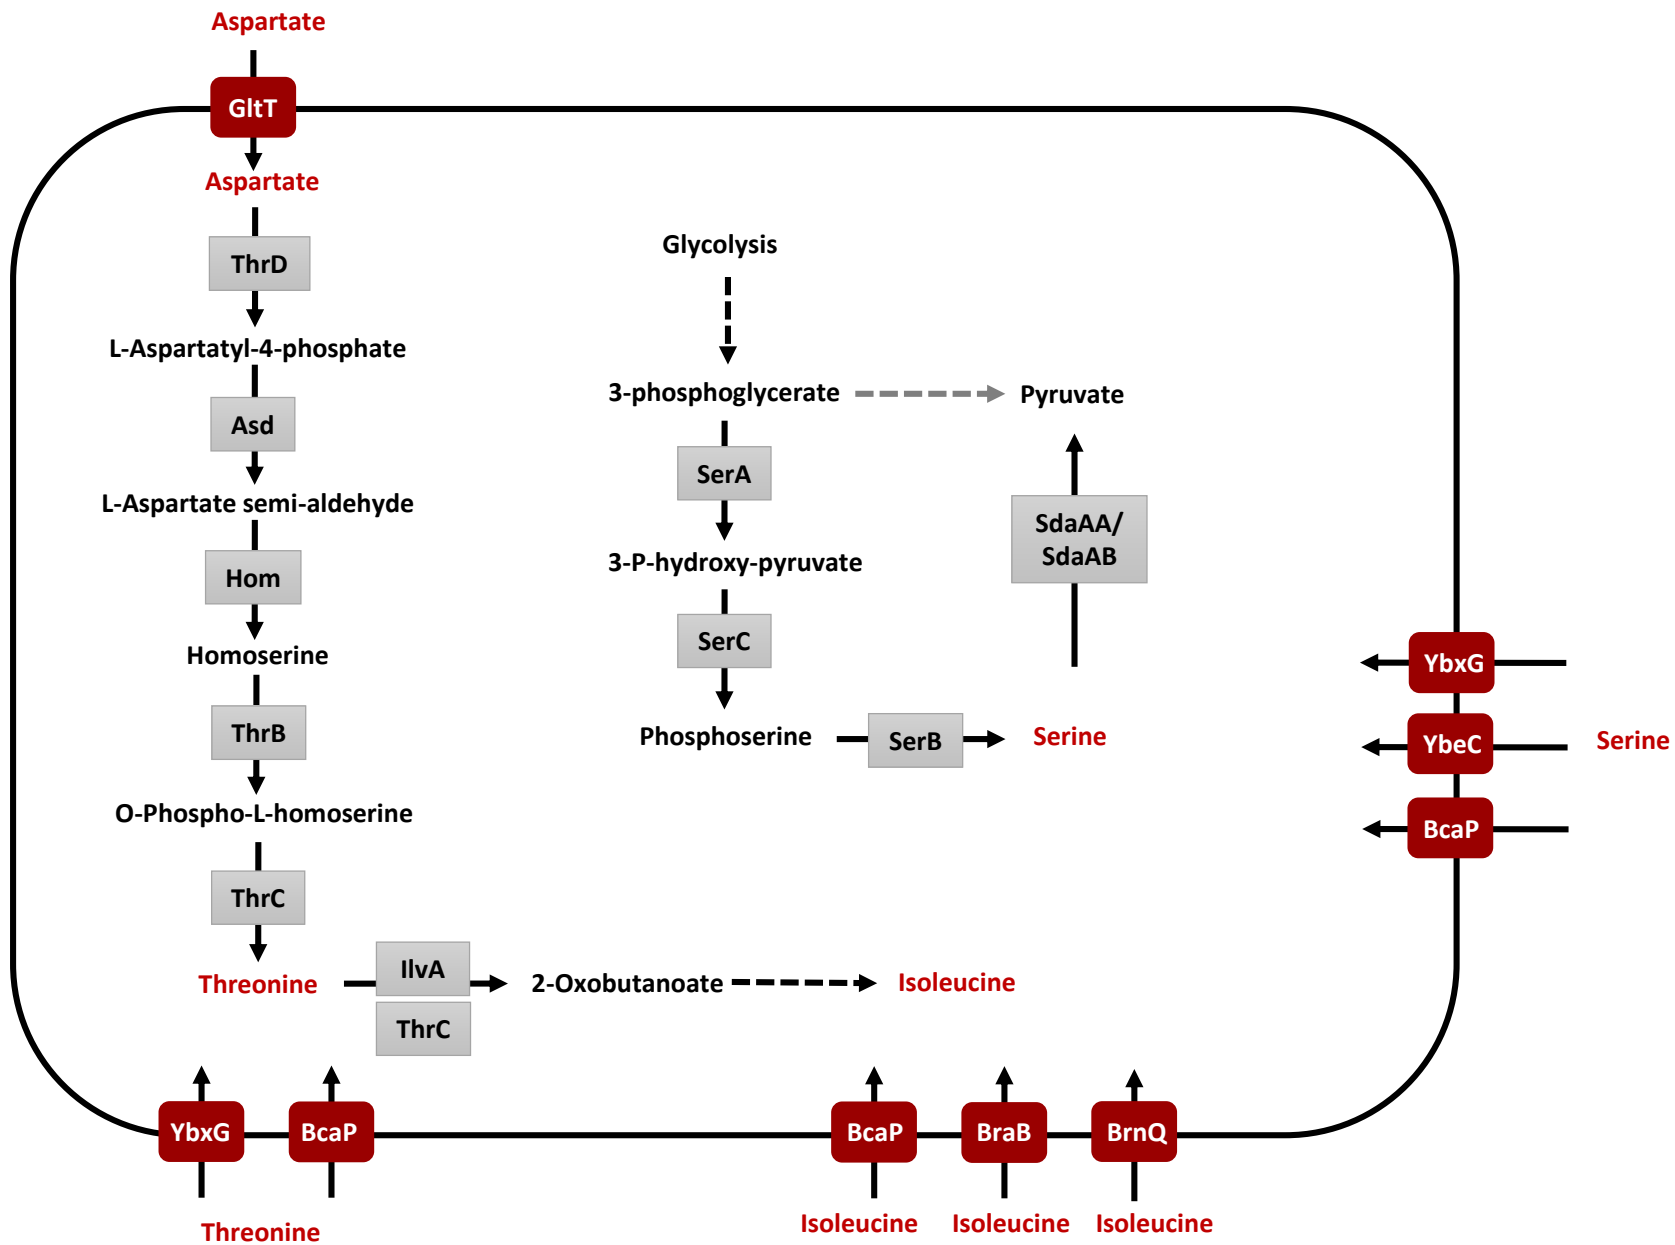



**A**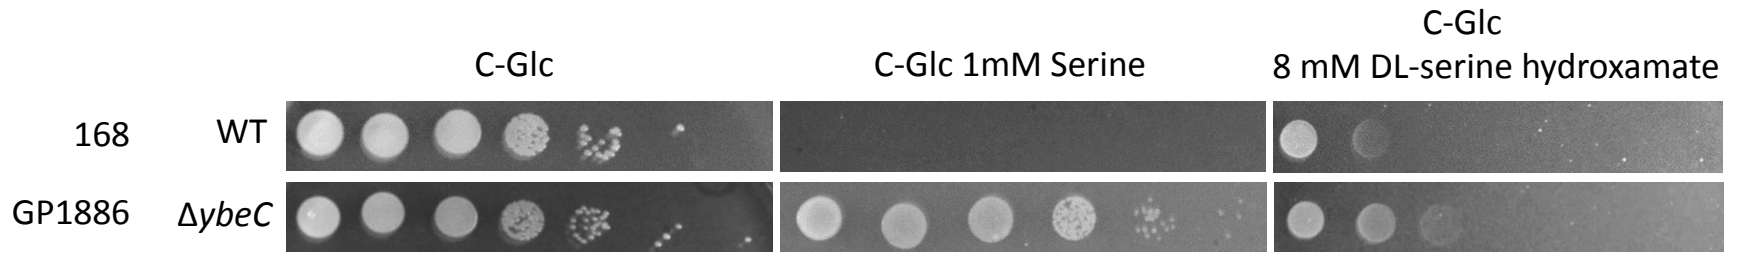**B**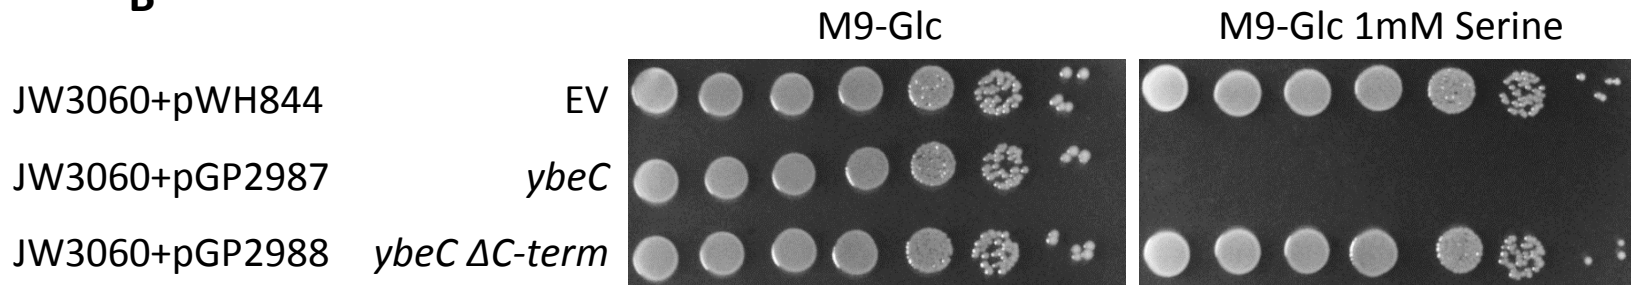

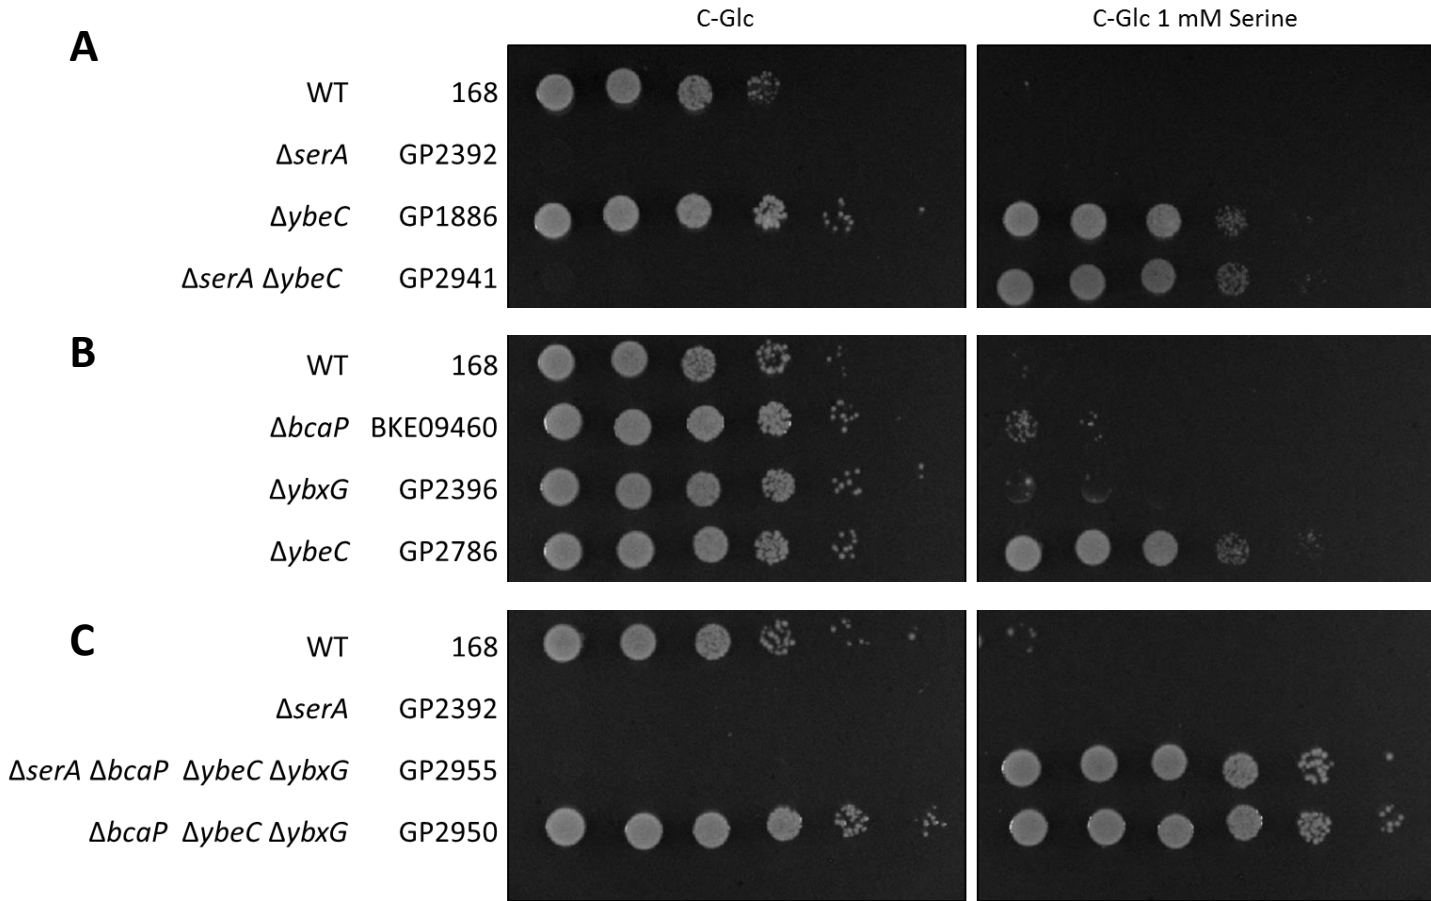

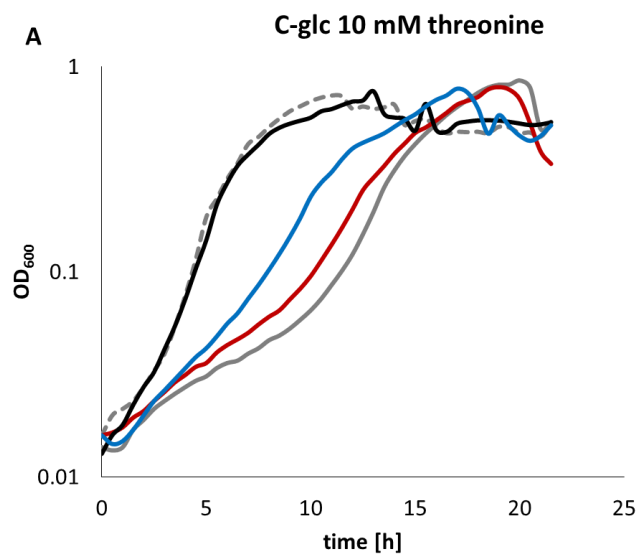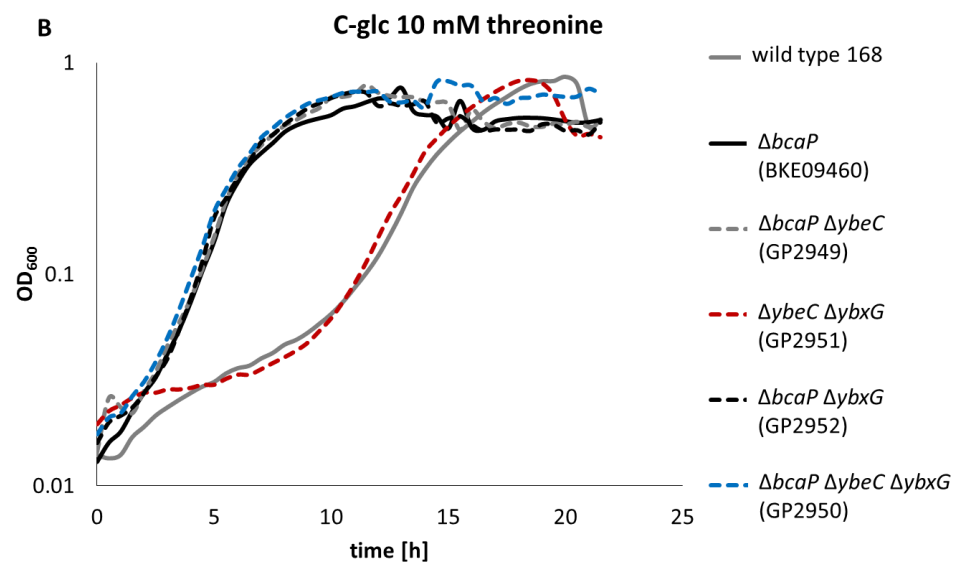

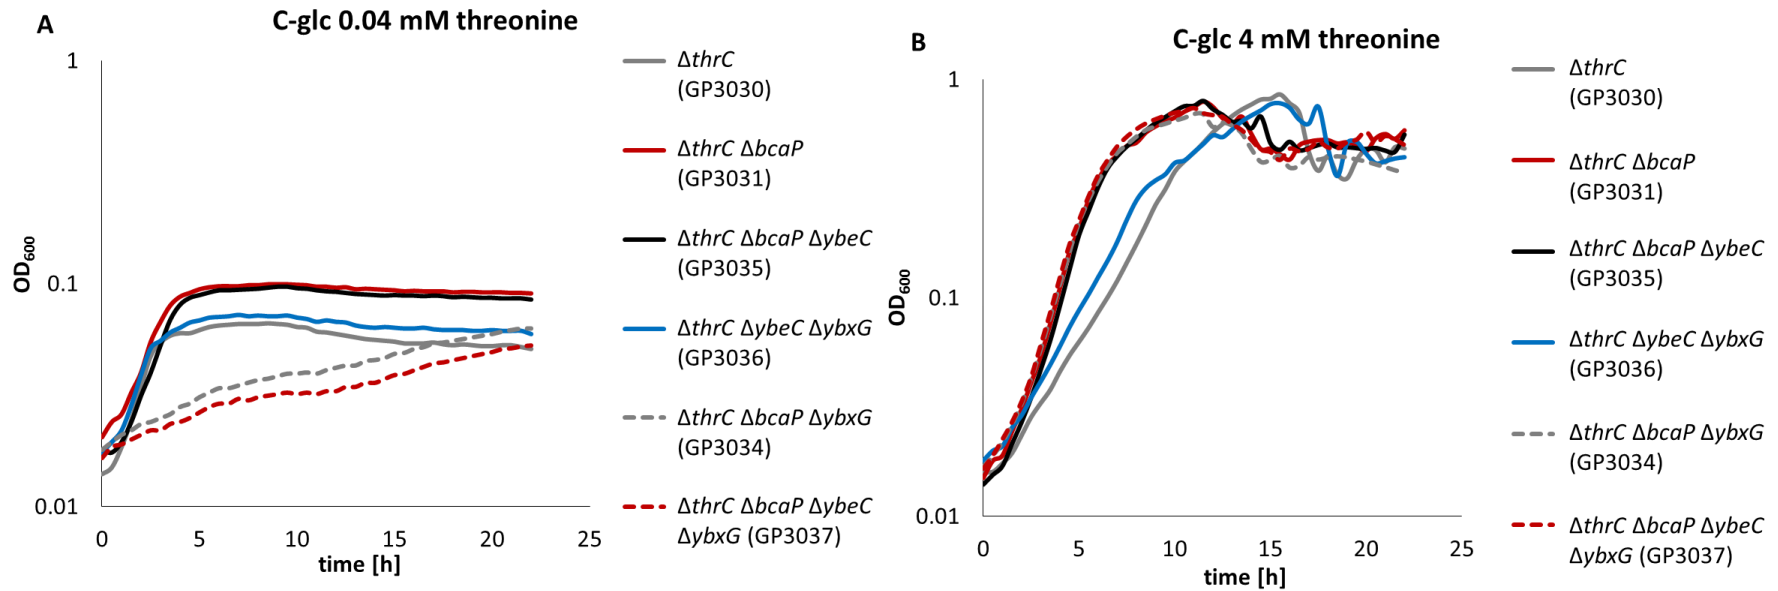

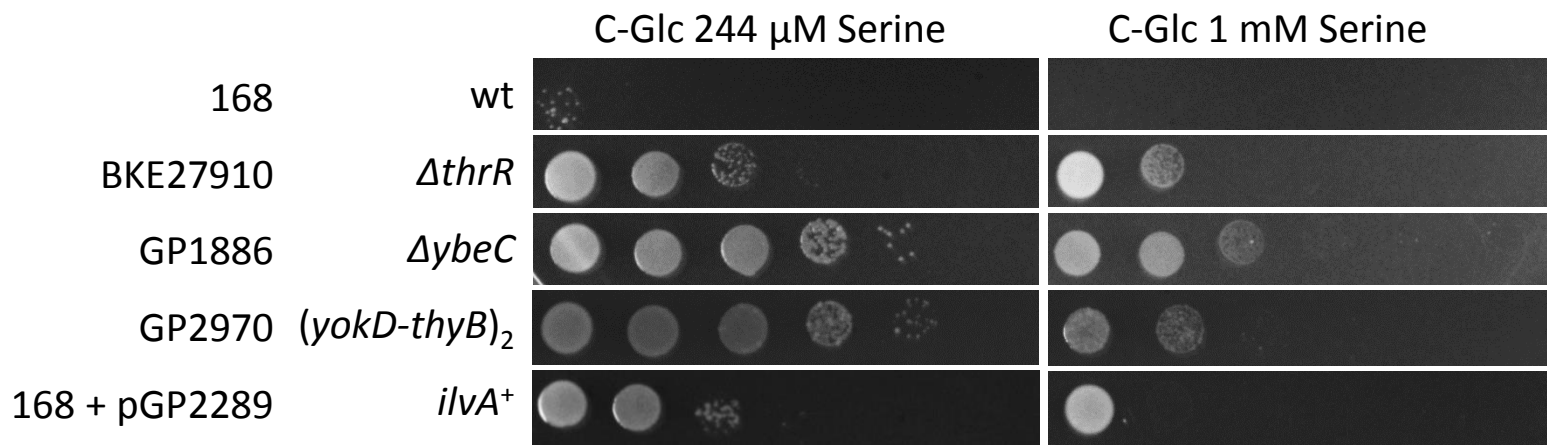

Source: https://www.biorxiv.org/content/10.1101/2020.05.20.106443v1.full.pdf
